# Supplementary material
Source: PubMed Central journal article supplement (PMC5383779)
Supplement: 10.1074_M117.066951_mcp.M117.066951-6.pdf [file 10.1074_M117.066951_mcp.M117.066951-6.pdf]

Supplemental Table 1

| PRMT name     | Gene ID       | PRMT type         | Size(kDa) |
|---------------|---------------|-------------------|-----------|
| HsPRMT1       | NP_938074     | I                 | 41        |
| HsPRMT2       | NP_001526     | I                 | 49        |
| HsPRMT3       | NP_005779     | I                 | 60        |
| HsPRMT4/CARM1 | NP_954592     | I                 | 66        |
| HsPRMT5       | NP_006100     | II                | 73        |
| HsPRMT6       | NP_060607     | I                 | 42        |
| HsPRMT7       | NP_061896     | II/III            | 78        |
| HsPRMT8       | NP_062828     | I                 | 45        |
| HsPRMT9       | NP_612373     | unknown           | 95        |
|               |               |                   |           |
| TgPRMT1       | TGME49_219520 | I                 | 44        |
| TgPRMT4       | TGME49_294270 | I                 | 72        |
| TgPRMT3       | TGME49_252420 | I                 | 88        |
| TgPRMT5       | TGME49_215560 | II                | 107       |
| TgPRMT2       | TGME49_293370 | I (weak homology) | 139       |

**Supplemental Table 1: PRMTs in *Toxoplasma gondii* and Human.**

Summary of PRMTs encoded by genomes of *T. gondii* and human. Type I and II PRMTs are present in *T. gondii*. PRMT classes are based on the terminal arginine modifications produced by the given enzyme [16]. PRMT activity type has not yet been established for all isoforms and was predicted bioinformatically.
