# Supplementary material
Source: PubMed Central journal article supplement (PMC5383779)
Supplement: 10.1074_M117.066951_mcp.M117.066951-7.pdf [file 10.1074_M117.066951_mcp.M117.066951-7.pdf]

Supplemental Table 2

| <b>ToxoDB ID</b> | <b>Protein Description</b>                                      | <b>Methyl Sites</b> |
|------------------|-----------------------------------------------------------------|---------------------|
| TGME49_313270    | Hypothetical Protein                                            | 11                  |
| TGME49_298610    | GYF Domain-Containing Protein                                   | 9                   |
| TGME49_228120    | Hypothetical Protein                                            | 8                   |
| TGME49_206670    | Hypothetical Protein                                            | 7                   |
| TGME49_265250    | RNA Recognition Motif-Containing Protein                        | 7                   |
| TGME49_269180    | MIF4G Domain-Containing Protein                                 | 6                   |
| TGME49_254940    | MIF4G Domain-Containing Protein                                 | 6                   |
| TGME49_291330    | RNA Recognition Motif-Containing Protein                        | 6                   |
| TGME49_263320    | Hypothetical Protein                                            | 6                   |
| TGME49_262620    | RNA Recognition Motif-Containing Protein                        | 5                   |
| TGME49_305780    | 5'-3' Exoribonuclease, Putative                                 | 5                   |
| TGME49_297430    | Hypothetical Protein                                            | 5                   |
| TGME49_300280    | LSM Domain-Containing Protein                                   | 4                   |
| TGME49_264610    | RNA Recognition Motif-Containing Protein                        | 4                   |
| TGME49_294710    | RNA Recognition Motif-Containing Protein                        | 4                   |
| TGME49_220260    | Hypothetical Protein                                            | 4                   |
| TGME49_304760    | RNA Recognition Motif-Containing Protein                        | 4                   |
| TGME49_287480    | Hypothetical Protein                                            | 4                   |
| TGME49_269710    | Hypothetical Protein                                            | 4                   |
| TGME49_253750    | PLU-1 Family Protein                                            | 4                   |
| TGME49_318440    | Helicase Associated Domain (Ha2) Protein                        | 4                   |
| TGME49_223880    | Zinc Finger, C3HC4 Type (RING Finger) Domain-Containing Protein | 4                   |
| TGME49_321680    | Hypothetical Protein                                            | 4                   |
| TGME49_254370    | Guanylyl Cyclase                                                | 4                   |
| TGME49_228460    | Hypothetical Protein                                            | 4                   |
| TGME49_306380    | U1 Zinc Finger Protein                                          | 3                   |
| TGME49_294620    | Eukaryotic Initiation Factor-3, Subunit 8, Putative             | 3                   |
| TGME49_314860    | Zinc Knuckle Domain-Containing Protein                          | 3                   |
| TGME49_235930    | Domain K- Type RNA Binding Proteins Family Protein              | 3                   |
| TGME49_291930    | RNA Recognition Motif-Containing Protein                        | 3                   |
| TGME49_270880    | RNA Recognition Motif-Containing Protein                        | 3                   |
| TGME49_228150    | Hypothetical Protein                                            | 3                   |
| TGME49_306660    | RNA Pseudouridine Synthase Superfamily Protein                  | 3                   |
| TGME49_236560    | Hypothetical Protein                                            | 3                   |
| TGME49_298020    | DEAD-Family Helicase                                            | 3                   |
| TGME49_264640    | Bromodomain-Containing Protein                                  | 3                   |
| TGME49_269650    | FFD And TFG Box Motifs Protein                                  | 3                   |
| TGME49_261490    | Hypothetical Protein                                            | 3                   |
| TGME49_293230    | Hypothetical Protein                                            | 3                   |

**Supplemental Table 2: Abundantly modified monomethylarginine proteins.**

Arginine monomethylated proteins with the highest numbers (>2 sites) of MMA sites detected in intracellular parasites.
