# Supplementary material
Source: PubMed Central journal article supplement (PMC5383779)
Supplement: 10.1074_M117.066951_mcp.M117.066951-8.pdf [file 10.1074_M117.066951_mcp.M117.066951-8.pdf]

Supplemental Table 3

| Gene ID       | Protein   | AP2 domain                                    | Phosphorylation                                                                                                                                                                                                                                         | Methyl                   |
|---------------|-----------|-----------------------------------------------|---------------------------------------------------------------------------------------------------------------------------------------------------------------------------------------------------------------------------------------------------------|--------------------------|
| TGME49_202490 | AP2VIIa-7 |                                               | S10, S28, S60, T51, S32, S56, S57, S346, S359, S834, S1416, S1445, S455, S1456, S2015, S2025, S2322, S238                                                                                                                                               | R261                     |
| TGME49_203690 | AP2VIIa-5 | 1838-1886                                     | S49, S433, S771, S1115, S1672, S2365                                                                                                                                                                                                                    | R914                     |
| TGME49_203710 | AP2VIIa-4 | 2325-2374                                     | S24, S68, Y78, S94, T76, S235, S265, S277, S239, S273, S283, S281, S557, S559, S635, S636, S641, S689, T832, S1052, S1069, T1070, S1358, S1899, S1906, S1977, S1978, S2468, S2464, S2469, S2472, S2540, S2791, S2793, S2982, S2985, S3176, S3181, S3325 | R3036                    |
| TGME49_216220 | AP2XI-5   | 777-825                                       | S63, S68, S69, T161, T167, S163, S213, S228, T622, T623, S640, S680, S733, S736, S753, Y757, Y755                                                                                                                                                       | R637                     |
| TGME49_218960 | AP2XII-1  | 672- 724;<br>1523-1577                        | T203, S235, S622, S748, S854, S899, S1014, S1046, S1402, S1391, S1382, S1392, S1383, S1384, S1394, S1754, S1736, S1750, S1751, S1740, S1856, S2101, S1754, S2112, S2104, S2113, S2106, S2147, S2150, S2259, T2263                                       | R419                     |
| TGME49_227900 | AP2X-1    |                                               | S394, S382, S378, S371, S379, S657, S677, S715, S1163, S1166                                                                                                                                                                                            | R390,<br>R1260           |
| TGME49_233120 | AP2VIII-2 | 341-388;<br>496-549;<br>854-893;<br>1505-1555 | S21, S40, S48, T620, S622, S608, S606, S610, S788, S1026, S1769, S/T1820, S1822, S1825, S1846, S1853, T1857, S2093, S2165, S2167                                                                                                                        | R275,<br>R1808,<br>R2385 |
| TGME49_247730 | AP2XII-5  | 296- 345                                      | S218, S220, T266, T268, S280, S282, S284, S390,                                                                                                                                                                                                         | R661,<br>R667            |

|               |           |           |                                                                                                                                   |                 |
|---------------|-----------|-----------|-----------------------------------------------------------------------------------------------------------------------------------|-----------------|
|               |           |           | S392, S467, S537, S925,<br>S930, S1066, S1070, S1299,<br>S1495                                                                    |                 |
| TGME49_262420 | APVIIb-1  |           | S261, S264, S426, S801                                                                                                            | R1636           |
| TGME49_272710 | AP2VIII-4 | 3187-3236 | S255, T327, S341, T332,<br>S333, S430, S438, S1191,<br>S1211, T2055, S2057,<br>S2558, S2561, S2649,<br>S2659, S2661, S2693, T3333 | R1109,<br>R1863 |

**Supplemental Table 3: Apicomplexan AP2 transcription factors**

Summary of 10 ApiAP2 transcription factors identified as being MMA modified across all biological samples examined in this study. AP2 domains (found by searching Interpro) and sites of phosphorylation (toxodb.org) are provided. Not all TgApiAP2 proteins have complete AP2 domains identified by pfam or Interpro analyses.
