# Supplementary material
Source: PubMed Central journal article supplement (PMC5383779)
Supplement: 10.1074_M117.066951_mcp.M117.066951-9.pdf [file 10.1074_M117.066951_mcp.M117.066951-9.pdf]

Supplemental Table 4

| Gene ID       | Product Description                                  | Methyl site |
|---------------|------------------------------------------------------|-------------|
| TGME49_204880 | hypothetical protein                                 | R747        |
| TGME49_205130 | hypothetical protein                                 | R673        |
| TGME49_209290 | ribosomal protein RPS28 (RPS28)                      | R76         |
| TGME49_224260 | PHD-finger domain-containing protein                 | R4536       |
| TGME49_229310 | mediator complex subunit MED14 (MED14)               | R2175       |
| TGME49_234900 | PHD-finger domain-containing protein                 | R2432       |
| TGME49_238510 | hypothetical protein                                 | R335        |
| TGME49_263320 | hypothetical protein                                 | R128        |
| TGME49_266010 | phosphatidylinositol 3- and 4-kinase                 | R967        |
| TGME49_266960 | beta tubulin                                         | R320        |
| TGME49_272710 | AP2 domain transcription factor AP2VIII-4 (AP2VIII4) | R3414       |
| TGME49_294740 | hypothetical protein                                 | R2132       |
| TGME49_306020 | hypothetical protein                                 | R276        |
| TGME49_311720 | chaperonin protein BiP                               | R107        |

**Supplemental Table 4:**

Summary of 14 proteins found within GCN5b immunoprecipitation mass spectrometry data, identified as being MMA modified across all biological samples examined in this study. The methyl sites identified in this dataset serve as a means of independent validation of these proteins in the *T. gondii* Monomethylome.
