# Supplementary material
Source: PubMed Central journal article supplement (PMC5383779)
Supplement: 10.1074_M117.066951_mcp.M117.066951-10.pdf [file 10.1074_M117.066951_mcp.M117.066951-10.pdf]

Supplemental Table 5

| <b>Gene ID</b> | <b>Product Description</b>                                     |
|----------------|----------------------------------------------------------------|
| TGME49_210980  | Alternative Splicing Type 3 And, Putative                      |
| TGME49_233120  | AP2 Domain Transcription Factor AP2VIII-2 (AP2VIII2)           |
| TGME49_218960  | AP2 Domain Transcription Factor AP2XII-1 (AP2XII1)             |
| TGME49_304630  | ATG C Terminal Domain-Containing Protein                       |
| TGME49_206450  | Autophagy-Related Cysteine Peptidase Atg4, Putative            |
| TGME49_228750  | Calcium Dependent Protein Kinase CDPK7 (CDPK7)                 |
| TGME49_236530  | DUF298 Domain-Containing Protein                               |
| TGME49_229630  | Eif2 Kinase IF2K-A (Incomplete Catalytic Triad)                |
| TGME49_201120  | ELMO/CED-12 Family Protein                                     |
| TGME49_238400  | Endonuclease/Exonuclease/Phosphatase Domain-Containing Protein |
| TGME49_317720  | Eukaryotic Translation Initiation Factor 3 Subunit 7, Putative |
| TGME49_220360  | FAD Binding Domain-Containing Protein                          |
| TGME49_262780  | FHA Domain-Containing Protein                                  |
| TGME49_311430  | Fibrillarin                                                    |
| TGME49_289050  | FIKK Kinase, Putative                                          |
| TGME49_231010  | General Transcription Factor IIE Polypeptide 1 GTF2E1 (GTF2E1) |
| TGME49_253880  | GNS1/SUR4 Family Protein                                       |
| TGME49_219520  | Histone Arginine Methyltransferase PRMT1 (PRMT1)               |
| TGME49_295610  | Histone Lysine Methyltransferase, SET, Putative                |
| TGME49_293230  | Hypothetical Protein                                           |
| TGME49_293320  | Hypothetical Protein                                           |
| TGME49_208400  | Hypothetical Protein                                           |
| TGME49_209210  | Hypothetical Protein                                           |
| TGME49_223080  | Hypothetical Protein                                           |
| TGME49_306020  | Hypothetical Protein                                           |
| TGME49_306440  | Hypothetical Protein                                           |
| TGME49_240060  | Hypothetical Protein                                           |
| TGME49_240660  | Hypothetical Protein                                           |
| TGME49_242780  | Hypothetical Protein                                           |
| TGME49_280590  | Hypothetical Protein                                           |
| TGME49_202760  | Hypothetical Protein                                           |
| TGME49_201760  | Hypothetical Protein                                           |
| TGME49_263440  | Hypothetical Protein                                           |
| TGME49_263320  | Hypothetical Protein                                           |
| TGME49_258490  | Hypothetical Protein                                           |
| TGME49_257580  | Hypothetical Protein                                           |

|               |                                                                       |
|---------------|-----------------------------------------------------------------------|
| TGME49_229390 | Hypothetical Protein                                                  |
| TGME49_230220 | Hypothetical Protein                                                  |
| TGME49_225560 | Hypothetical Protein                                                  |
| TGME49_224160 | Hypothetical Protein                                                  |
| TGME49_212220 | Hypothetical Protein                                                  |
| TGME49_309190 | Hypothetical Protein                                                  |
| TGME49_315700 | Hypothetical Protein                                                  |
| TGME49_248720 | Hypothetical Protein                                                  |
| TGME49_278030 | Hypothetical Protein                                                  |
| TGME49_286590 | Microtubule Associated Protein SPM2 (SPM2)                            |
| TGME49_239560 | Myosin E                                                              |
| TGME49_259200 | Na <sup>+</sup> /H <sup>+</sup> Exchanger NHE1                        |
| TGME49_286160 | Non-Specific Serine/Threonine Protein Kinase                          |
| TGME49_273520 | PCI Domain-Containing Protein                                         |
| TGME49_296010 | Phosphatidylinositol 3- And 4-Kinase                                  |
| TGME49_267100 | Protein Phosphatase 2C Domain-Containing Protein                      |
| TGME49_209130 | Regulator Of Chromosome Condensation (RCC1) Repeat-Containing Protein |
| TGME49_215785 | Rhoptry Protein ROP2A (ROP2A)                                         |
| TGME49_275810 | Ribosomal Protein RPS10 (RPS10)                                       |
| TGME49_313910 | RNA Recognition Motif 2 Protein                                       |
| TGME49_208970 | RNA Recognition Motif-Containing Protein                              |
| TGME49_283740 | RNA Recognition Motif-Containing Protein                              |
| TGME49_270640 | RNA Recognition Motif-Containing Protein                              |
| TGME49_290270 | SPRY Domain-Containing Protein                                        |
| TGME49_203910 | TBC Domain-Containing Protein                                         |
| TGME49_209450 | TLD Protein                                                           |
| TGME49_309140 | Transducin Beta-Like Protein TBL1 (TBL1)                              |
| TGME49_236910 | U2 Snrnp Auxiliary Factor, Putative                                   |
| TGME49_311625 | WD Domain, G-Beta Repeat-Containing Protein                           |
| TGME49_215440 | WWE Domain-Containing Protein                                         |
| TGME49_256820 | Zinc Finger (CCCH Type) Motif-Containing Protein                      |

**Supplemental table 5: High confidence candidate PRMT1 substrates.**

Proteins present in the MMA intracellular union dataset but not in the PRMT1KO dataset were considered to be candidate PRMT1 substrates. High confidence PRMT1 substrates are candidate PRMT1 substrates whose methylation was restored in PRMT1COMP.
