# Supplementary material
Source: PubMed Central journal article supplement (PMC5383779)
Supplement: 10.1074_M117.066951_mcp.M117.066951-11.pdf [file 10.1074_M117.066951_mcp.M117.066951-11.pdf]

Supplemental Table 6

| <b>Sample</b>              | <b>Biological replicate</b> | <b>proteins</b> | <b>unique</b> | <b>Overlap technical replicates</b> |
|----------------------------|-----------------------------|-----------------|---------------|-------------------------------------|
| RH_HXGPRT_intracellular1_1 | WT1                         | 162             | 35            | 127                                 |
| RH_HXGPRT_intracellular1_2 | WT1                         | 160             | 33            |                                     |
| RH_HXGPRT_intracellular2_1 | WT2                         | 190             | 33            | 157                                 |
| RH_HXGPRT_intracellular2_2 | WT2                         | 195             | 38            |                                     |
| RH_PRMT-1KO_1              | PRMT1 KO                    | 108             | 18            | 90                                  |
| RH_PRMT-1KO_2              | PRMT1 KO                    | 109             | 19            |                                     |
| RH_PRMT-1_COMP_HXGPRT_1    | PRMT1 COMP                  | 167             | 31            | 136                                 |
| RH_PRMT-1_COMP_HXGPRT_2    | PRMT1 COMP                  | 170             | 34            |                                     |
| RH_ku80_intracellular_1    | WT3                         | 201             | 40            | 161                                 |
| RH_ku80_intracellular_2    | WT3                         | 202             | 41            |                                     |
| RH_ku80_extracellular_1    | EXTRA                       | 169             | 32            | 137                                 |
| RH_ku80_extracellular_1    | EXTRA                       | 168             | 31            |                                     |

**Supplemental Table 6: Sample Summary**

Summary of all biological and technical replicates analyzed in this study including protein number and overlap between technical replicates.
