# Supplementary material
Source: PubMed Central journal article supplement (PMC5383779)

**A**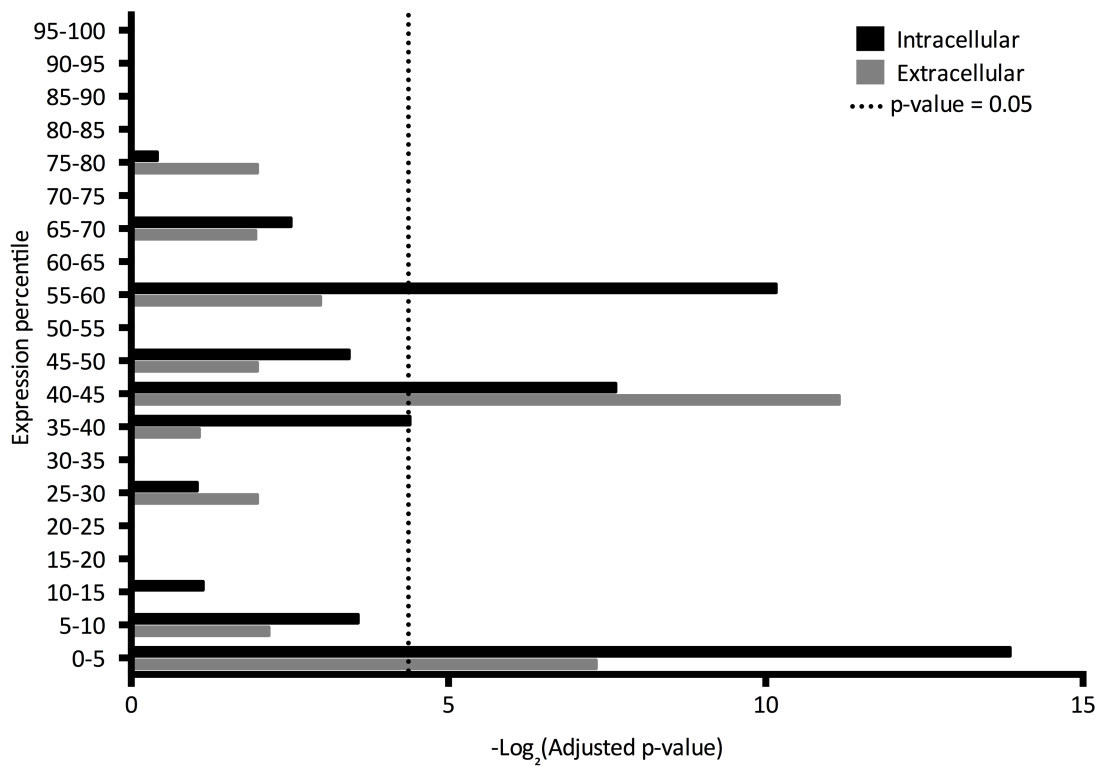**B**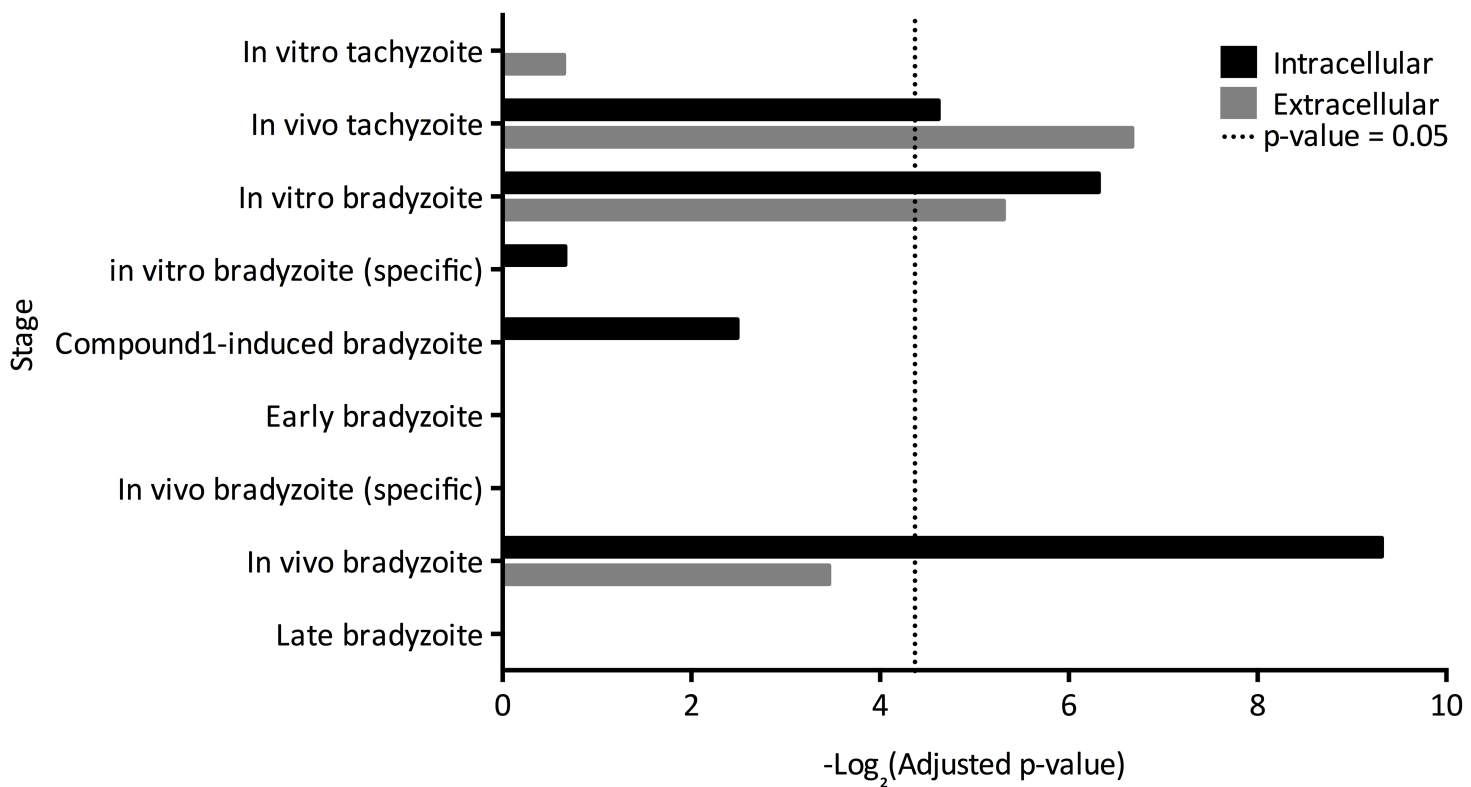

Supplement: 10.1074_M117.066951_mcp.M117.066951-1.pdf [file 10.1074_M117.066951_mcp.M117.066951-1.pdf]

**B****KO****COMP**pl 3  10pl 3  10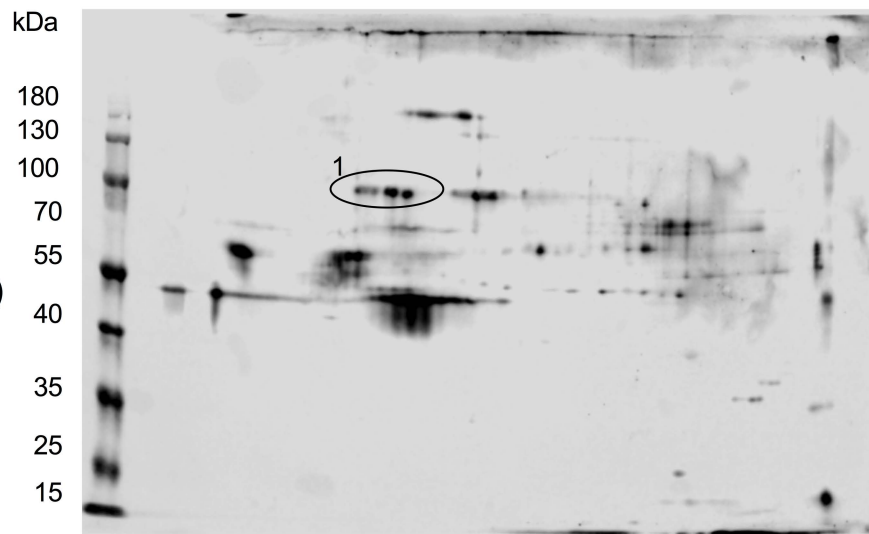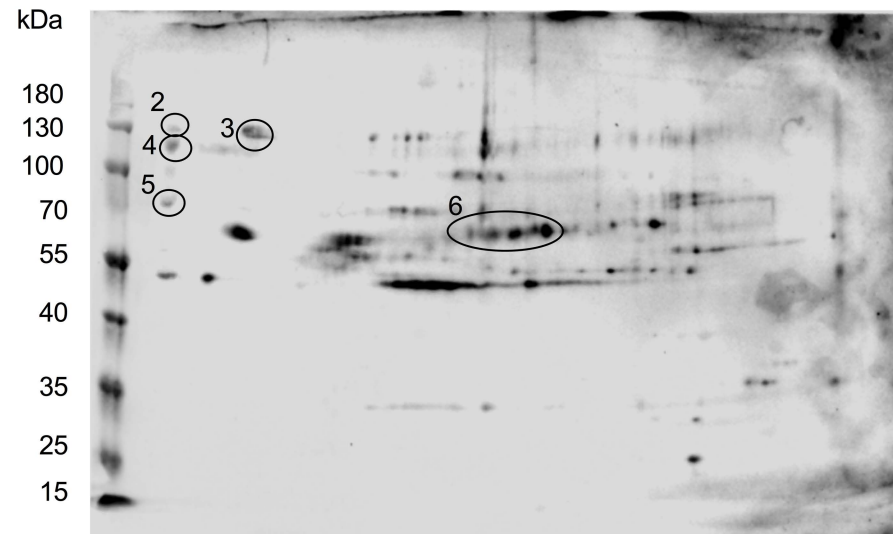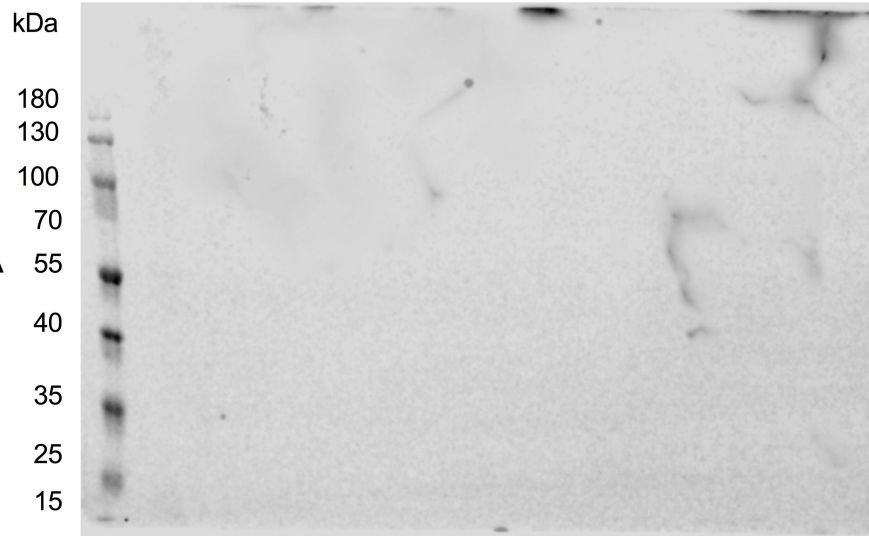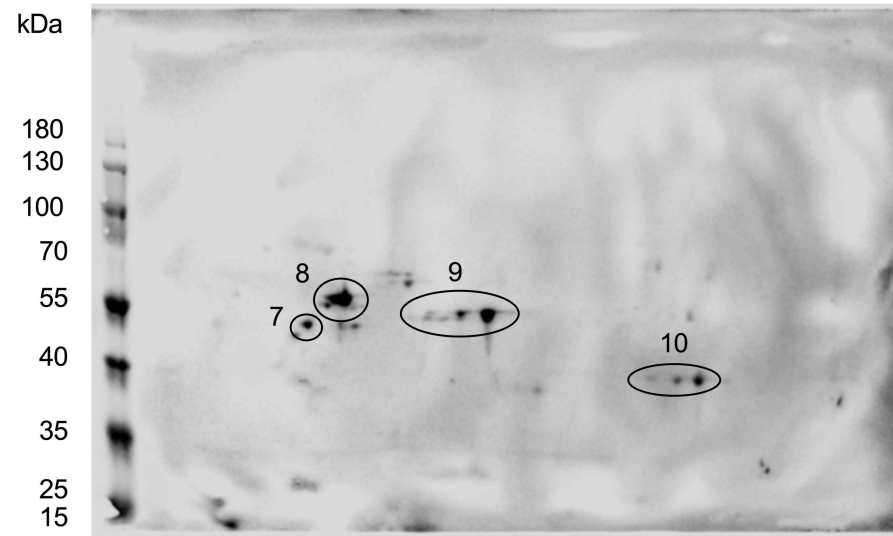

Supplement: 10.1074_M117.066951_mcp.M117.066951-16.pdf [file 10.1074_M117.066951_mcp.M117.066951-16.pdf]

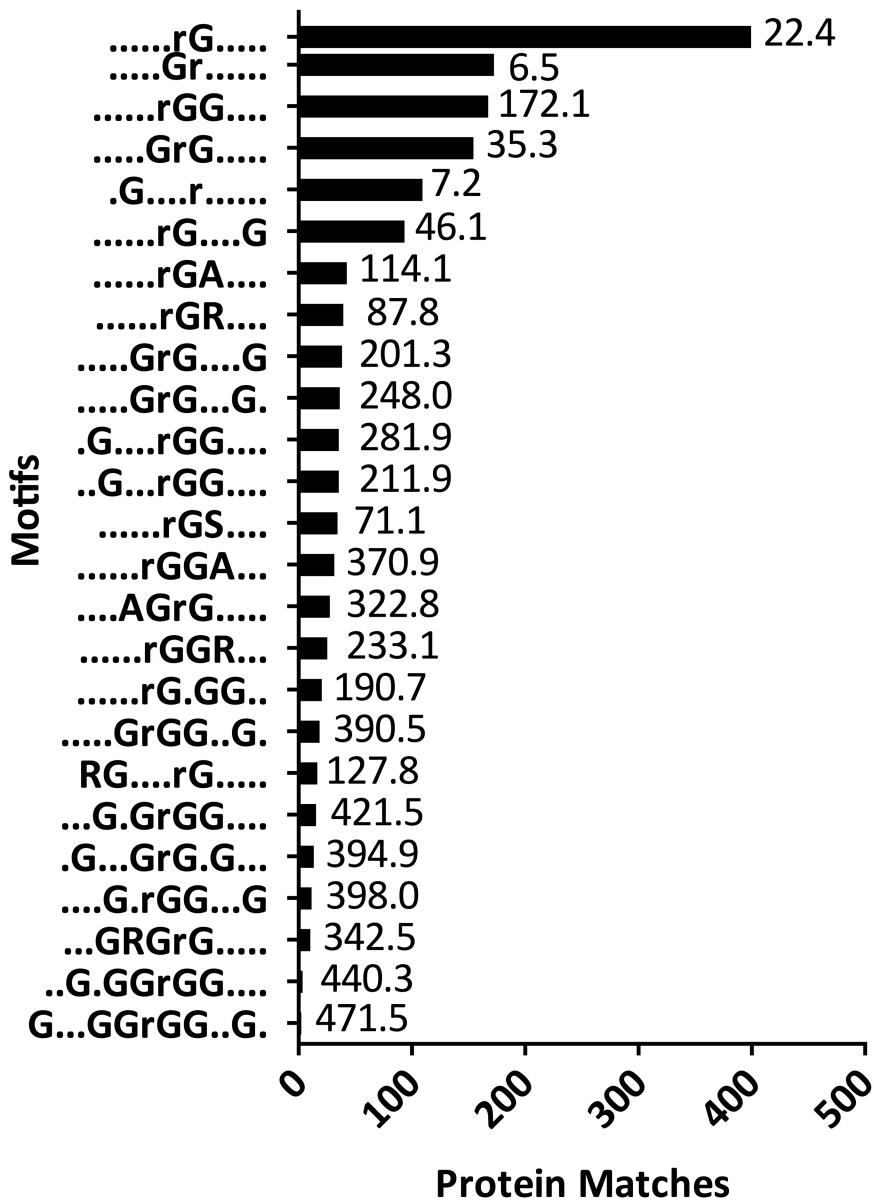

Supplement: 10.1074_M117.066951_mcp.M117.066951-3.pdf [file 10.1074_M117.066951_mcp.M117.066951-3.pdf]

# AP2 XII-1

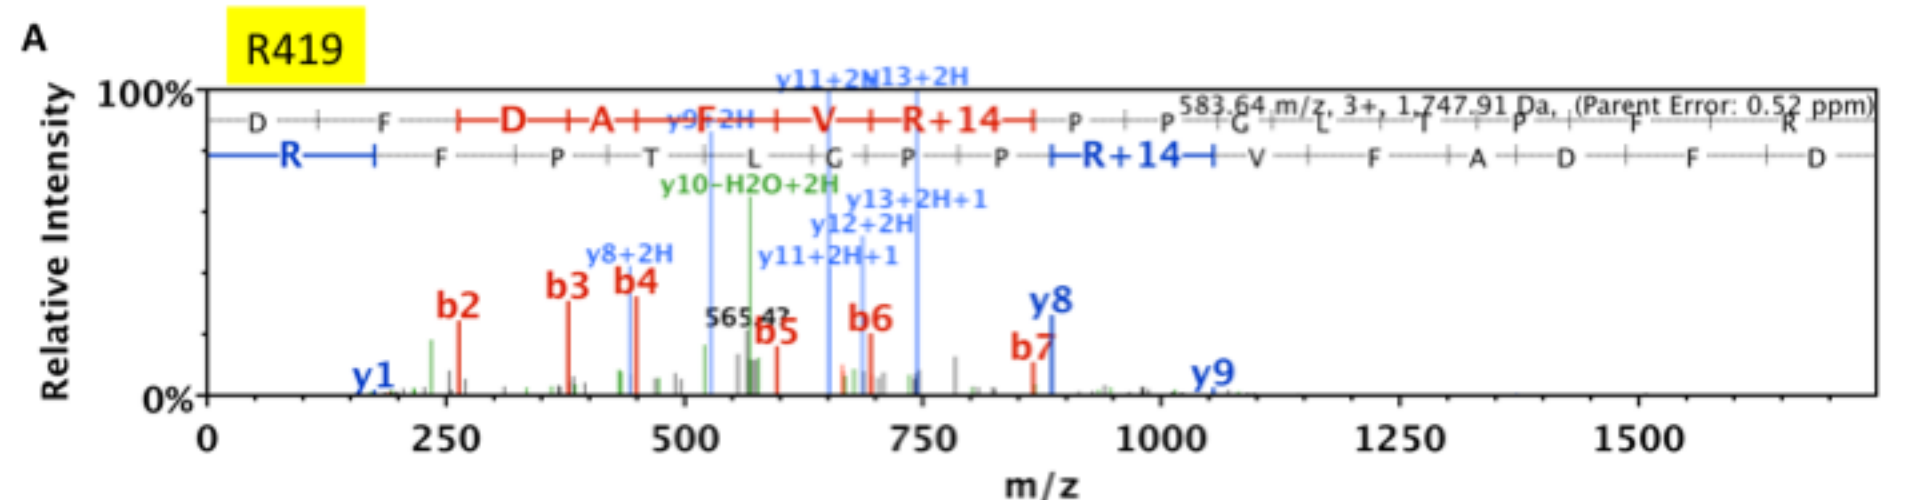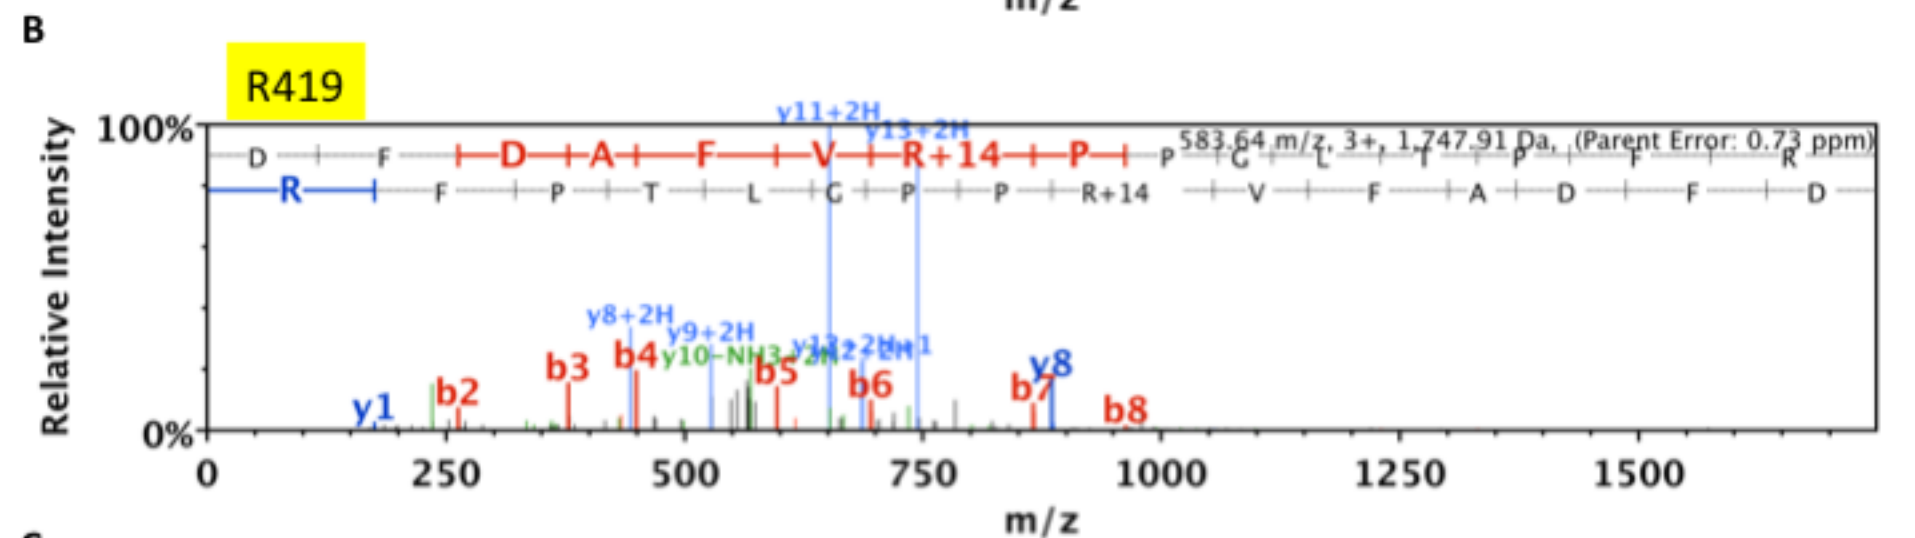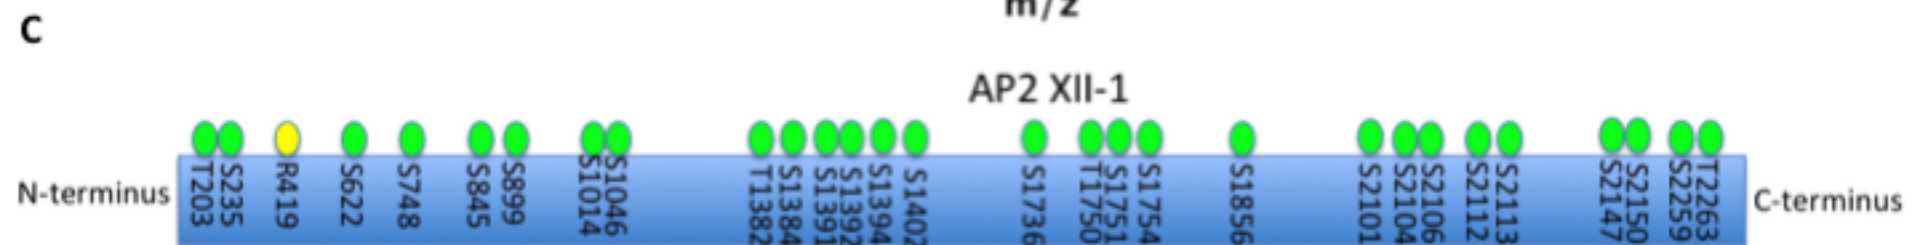

Supplement: 10.1074_M117.066951_mcp.M117.066951-4.pdf [file 10.1074_M117.066951_mcp.M117.066951-4.pdf]

**A**

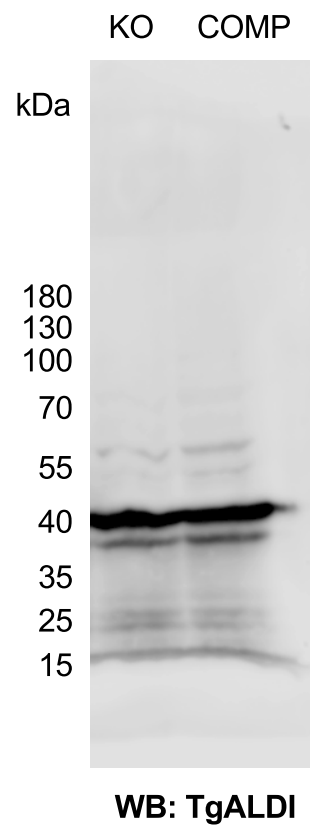

Supplement: 10.1074_M117.066951_mcp.M117.066951-5.pdf [file 10.1074_M117.066951_mcp.M117.066951-5.pdf]
